# Supplementary material for: CKLF1 Enhances Inflammation-Mediated Carcinogenesis and Prevents Doxorubicin-Induced Apoptosis via IL6/STAT3 Signaling in HCC
Source: Oxford University Press journal article supplement (doi:10.1158/1078-0432.ccr-18-3510), 2019-03-28
Supplement: 10780432ccr183510-sup-210723_2_supp_5392774_pv7jfv.doc [file 10780432ccr183510-sup-210723_2_supp_5392774_pv7jfv.doc]

**Supplementary Table 1.Results of GO function analysis of up-regulated genes associated with HCC**

| GO：function category | count | P value |
| --- | --- | --- |
| Gene to GO BP test for over-expresentation |  |  |
| GO：0007049~cell cycle  GO：0022402~cell cycle process  GO：0000278~mitotic cell cycle  GO：1903047~ mitotic cell cycle process  GO：0048285~ organelle fission  GO：0000280~nuclear division  GO：0051301~cell division  GO：0051726~regulation of cell cycle  GO：0051276~chromosome organization  GO：0007067~mitotic nuclear division | 103  96  82  79  61  60  60  56  54  53 | 0.000  0.000  0.000  0.000  0.000  0.000  0.000  0.000  0.000  0.000 |

**Supplementary Table 2.KEGG pathway analysis of up-regulated genes associated with HCC**

| Category of signaling pathway | ExpCount | count | P value | Size |
| --- | --- | --- | --- | --- |
| Hsa04110:cell cycle | 2.065 | 19 | 0.000 | 122 |
| Hsa04114:Oocyte meiosis  Has05222:Small cell lung cancer  Hsa04914:Progesterone-mediated oocyte maturation  Hsa05200:Pathway in cancer  Hsa04115:P53 signaling pathway  Hsa04512:ECM-receptor interaction  Hsa05206:microRNAs in cancer  Hsa04068:Foxo signaling pathway  Hsa03460:Fanconi anemia pathway | 1.845  1.439  1.456  6.602  1.151  1.337  2.539  2.218  5.027 | 13  9  8  18  7  7  9  7  4 | 0.000  0.000  0.000  0.000  0.000  0.000  0.001  0.007  0.008 | 109  85  86  390  68  79  150  131  47 |

**Supplementary Table 3.CKLF1 mRNA levels Analyzed via qPCR Analysis**

| Tissues Group | Total No. of Tissues | No. with CKLF1 Overexpression | Ratio (%) | | P |
| --- | --- | --- | --- | --- | --- |
| HCC tissues | 58 | 37 | 63.79 | < 0.001 | |
| adjacent non-tumor tissues | 58 | 18 | 31.03 |

**Supplementary Table 4.CKLF1 Protein Levels Measured with Western Blotting Analysis**

| Tissues Group | Total No. of Tissues | No. with CKLF1 Overexpression | Ratio (%) | P |
| --- | --- | --- | --- | --- |
| HCC tissues | 58 | 40 | 68.97 | < 0.001 |
| adjacent non-tumor tissues | 58 | 14 | 24.14 |

**Supplementary Table 5.CKLF1 Protein Levels Measured with Immunohistochemical Analysis**

| Tissues Group | Total No. of Tissues | No. with CKLF1 Overexpression | Ratio (%) | P |
| --- | --- | --- | --- | --- |
| HCC tissues | 46 | 29 | 63.04 | < 0.01 |
| adjacent non-tumor tissues | 46 | 10 | 21.74 |

**Supplementary Table 6.CKLF1 Protein Levels Detected in different characteristic of HCC tissues via IHC**

| **Characteristics** | **Total** | **CKLF1 expression** | | **P** |
| --- | --- | --- | --- | --- |
| **Negative** | **Positive** |
| Age (year's old) |  |  |  |  |
| <60 | 30 | 11 | 19 | 0.956 |
| ≥60 | 16 | 6 | 10 |
| Gender |  |  |  |  |
| Male | 29 | 11 | 18 | 0.858 |
| Female | 17 | 6 | 11 |
| Tumor size (cm) |  |  |  |  |
| <5 | 25 | 13 | 12 | 0.021 |
| ≥5 | 21 | 4 | 17 |
| Vascular Invasion |  |  |  |  |
| Absent | 20 | 11 | 9 | 0.0261 |
| Present | 26 | 6 | 20 |
| Tumor stage |  |  |  |  |
| I | 16 | 10 | 6 | 0.009 |
| II~IV | 30 | 7 | 23 |
| Hepatitis B s antigen |  |  |  |  |
| Negative | - | - | - | - |
| Positive | 46 | 17 | 29 |

**Supplementary Table 7. Univariate and Multivariate Analysis of Factors Associated with Survival of HCC Patients**

| **Features** | **Overall Survival** | | | |
| --- | --- | --- | --- | --- |
| **Univariate P Value** | **Multivariate** | | |
| **HR** | **95% CI** | **P Value** |
|
| Age ( <60 vs. ≥60 years) | 0.442 |  |  | NA |
|
| Gender (female vs. male) | 0.376 |  |  | NA |
|
| AFP (<400 vs. ≥400ng/ml) | 0.023 |  |  | NS |
|
| Tumor size ( <5 vs. ≥5 cm) | < 0.001 | 3.138 | 2.010-5.187 | <0.001 |
|
| Microvascular invasion (yes vs. no) | < 0.001 | 1.675 | 1.232-2.453 | 0.013 |
|
| TNM stage (II~IV vs. I) | < 0.001 | 2.33 | 1.3-4.2 | 0.0037 |
|
| CKLF1 level (low vs. high) | 0.0043 | 1.61 | 1.09-2.39 | 0.017 |
|

Abbreviations: AFP, alpha fetoprotein; NA, not adopted; NS, not significant

**Supplementary Table 8.Statistics of in vivo tumorigenicity assays**

**Upregulation of CKLF1 promoted cell tumorigenic ability**

|  | Blank Group （NIH3T3) | Control Group ( NIH3T3-pcDNA 3.1） | Positive Control Group (HCCLM3) | Treatment Group (NIH3T3-CKLF1) |
| --- | --- | --- | --- | --- |
| No. of injected nude mice | 3 | 5 | 3 | 8 |
| No. of nude mice formed tumors | 0 | 0 | 3 | 7 |

**Supplementary Table 9.Statistics of in vivo tumorigenicity assays**

**Downregulation of CKLF1 weakened cell tumorigenic ability**

|  | Positive Control Group (HCCLM3) | Control Group ( HCCLM3-pSilencer-NC） | Treatment Group (HCCLM3-pSilencer-shCKLF1) |
| --- | --- | --- | --- |
| No. of injected nude mice | 3 | 5 | 8 |
| No. of nude mice formed tumors | 3 | 5 | 4 |

**Supplementary Table 10.Statistics of in vivo tumorigenicity assays**

**Stattic inhibited the tumorigenic ability induced by CKLF1**

|  | Control Group (Bel7402-pcDNA3.1) | Control Group (Bel7402-CKLF1) | Treatment Group (Bel7402-CKLF1+Stattic) |
| --- | --- | --- | --- |
| No. of injected nude mice | 3 | 5 | 5 |
| No. of nude mice formed tumors | 0 | 4 | 2 |
